# Supplementary material for: Dual-mode ion-selective electrodes and distance-based microfluidic device for detection of multiple urinary electrolytes
Source: Royal Society of Chemistry journal article supplement (doi:10.1039/d2an01220k), 2022-01-01
Supplement: d2an01220k1.pdf [file d2an01220k1.pdf]

## Supplementary Information

### Dual-mode Ion-Selective Electrodes and Distance-based Microfluidic Device for Detection of Multiple Urinary Electrolytes

Kamonchanok Phoonsawat <sup>a, b, c</sup>, Tugba Ozer <sup>d\*</sup>, Wijitar Dungchai <sup>a</sup>, Charles S. Henry <sup>d, e, f\*</sup>

<sup>a</sup> *Organic Synthesis, Electrochemistry & Natural Product Research Unit, Department of Chemistry, Faculty of Science, King Mongkut's University of Technology Thonburi, Bangkok, 10140, Thailand*

<sup>b</sup> *Engineering Science Classroom, Darunsikkhalai School, King Mongkut's University of Technology Thonburi, Bangkok, 10140, Thailand*

<sup>c</sup> *Department of Chemistry, Colorado State University, Fort Collins, CO 80523, United States*

<sup>d</sup> *Department of Bioengineering, Faculty of Chemical-Metallurgical Engineering, Yildiz Technical University, 34220 Istanbul, Turkey*

<sup>e</sup> *School of Biomedical Engineering, Colorado State University, Fort Collins, Colorado 80523, United States*

<sup>f</sup> *Metallurgy and Materials Science Research Institute, Chulalongkorn University, Bangkok, Thailand*

*Co-Corresponding authors: Tugba Ozer and Charles S. Henry*

*E-mail: tozer@yildiz.edu.tr (Tugba Ozer)*

*E-mail: Chuck.Henry@colostate.edu (Charles S. Henry)*

## Table of Contents

### Table title

**Table S1** Estimated cost breakdown of reagents and materials for each device.

**Table S2** The effect of carbon black modification on potentiometric response of the ISEs (n=4)

**Table S3** Potentiometric response of K<sup>+</sup>-ISE and Na<sup>+</sup>-ISE obtained in absence and in presence of conditioning step (n=4)

**Table S4** Potentiometric response parameters of K<sup>+</sup>-ISE and Na<sup>+</sup>-ISE (n=10)

**Table S5** Shelf life of dual-ISE-dPAD (n=4)

### Figure captions

**Figure S1** SEM images of (a) unmodified, (b) carbon black (5 mg/mL in THF) modified screen-printed electrodes. (x5000 magnified).

**Figure S2** Effect of pH on potentiometric responses of K<sup>+</sup>-ISE and Na<sup>+</sup>-ISE.

**Figure S3** The selectivity of (a) K<sup>+</sup>-ISE and (b) Na<sup>+</sup>-ISE in the coexistence of interference ions. (Concentration: 10 mM of targets analyte (K<sup>+</sup> or Na<sup>+</sup>) and potential interferences including 100 mM of Ca<sup>2+</sup>, Mg<sup>2+</sup>, PO<sub>4</sub><sup>3-</sup>, CO<sub>3</sub><sup>2-</sup>, D-glucose, and Urea)

**Figure S4** Water layer tests of the (a) K<sup>+</sup>-ISE and (b) Na<sup>+</sup>-ISE.

**Figure S5** Effect of pH on the Cl<sup>-</sup> detection on dPAD (20 mM Cl<sup>-</sup>)

**Figure S6** The selectivity of Cl<sup>-</sup> in the coexistence of interference ions. Concentration: 20 mM Cl<sup>-</sup> and potential interferences including 100 mM of Ca<sup>2+</sup>, Mg<sup>2+</sup>, PO<sub>4</sub><sup>3-</sup>, CO<sub>3</sub><sup>2-</sup>, glucose, urea, Na<sup>+</sup>, and K<sup>+</sup>

**Table S1.** Estimated cost breakdown of reagents and materials for each device.

|                       | <b>Materials</b>                              | <b>Estimated cost/device (\$)</b> |
|-----------------------|-----------------------------------------------|-----------------------------------|
| <b>dPAD</b>           | Whatman <sup>®</sup> qualitative filter paper | 0.0075                            |
|                       | Solid wax ink                                 | 0.0050                            |
|                       | Double-side adhesive                          | 0.203                             |
|                       | AgNO <sub>3</sub>                             | 0.0010                            |
|                       | K <sub>2</sub> Cr <sub>2</sub> O <sub>7</sub> | 0.000054                          |
|                       | <b>Subtotal</b>                               | <b>0.22</b>                       |
| <b>Electrode</b>      | Graphite powder                               | 0.0014                            |
|                       | Carbon ink                                    | 0.015                             |
|                       | Ag AgCl ink                                   | 0.009                             |
|                       | Carbon black                                  | 0.00000025                        |
|                       | <b>Subtotal</b>                               | <b>0.025</b>                      |
| <b>ISM components</b> | Valinomycin                                   | 0.032                             |
|                       | KTCIPB                                        | 0.0012                            |
|                       | NaTFPB                                        | 0.0024                            |
|                       | DOS                                           | 0.048                             |
|                       | High molecular weight PVC                     | 0.000047                          |
|                       | P(BMA-co-MM)                                  | 0.000412                          |
|                       | KCl                                           | 0.0000544                         |
|                       | ETH500                                        | 0.00464                           |
|                       | THF                                           | 0.000772                          |
|                       | <b>Subtotal</b>                               | <b>0.089</b>                      |
| <b>Total</b>          | <b>\$ 0.33</b>                                |                                   |

**Table S2** The effect of carbon black modification on potentiometric response of the ISEs (n=4)

| target ion      | slope (mV/decade) |                      |
|-----------------|-------------------|----------------------|
|                 | with carbon black | without carbon black |
| K <sup>+</sup>  | 54.16 ± 3.94      | 44.54 ± 3.49         |
| Na <sup>+</sup> | 55.82 ± 1.15      | 38.03 ± 6.78         |

**Table S3** Potentiometric response of K<sup>+</sup>-ISE and Na<sup>+</sup>-ISE obtained in absence and in presence of conditioning step (n=4)

| target ion      | slope (mV/decade) |                       |
|-----------------|-------------------|-----------------------|
|                 | non conditioned   | overnight conditioned |
| K <sup>+</sup>  | 54.16 ± 3.94      | 43.81 ± 2.22          |
| Na <sup>+</sup> | 55.82 ± 1.15      | 38.42 ± 5.14          |

**Table S4** Potentiometric response parameters of K<sup>+</sup>-ISE and Na<sup>+</sup>-ISE (n=10)

| target ion      | slope (mV/decade) | RSD % | intercept (mV) | RSD % |
|-----------------|-------------------|-------|----------------|-------|
| K <sup>+</sup>  | 52.85±2.65        | 5.0   | 386.38±7.91    | 2.0   |
| Na <sup>+</sup> | 52.10±1.41        | 2.7   | 333.77±9.78    | 2.9   |

**Table S5** Shelf life of dual-ISE-dPAD (n=4)

| weeks   | slope (mV/decade) |                 | %Recovery       |
|---------|-------------------|-----------------|-----------------|
|         | K <sup>+</sup>    | Na <sup>+</sup> | Cl <sup>-</sup> |
| 0       | 54.14 ± 3.94      | 55.08 ± 1.15    | 94 ± 5          |
| 1       | 53.50 ± 1.63      | 53.98 ± 3.41    | 92 ± 5          |
| 2       | 52.70 ± 1.20      | 52.62 ± 0.41    | 102 ± 6         |
| 3       | 51.10 ± 0.28      | 51.63 ± 2.06    | 92 ± 5          |
| 4       | 50.70 ± 0.42      | 51.09 ± 2.18    | 90 ± 9          |
| 5       | 50.18 ± 1.22      | 51.53 ± 0.21    | 94 ± 5          |
| 6       | 50.40 ± 0.85      | 50.53 ± 0.71    | 99 ± 5          |
| 7       | 51.40 ± 1.84      | 50.34 ± 1.51    | 97 ± 8          |
| 8       | 50.04 ± 0.85      | 51.65 ± 1.38    | 94 ± 5          |
| Average | 51.57 ± 1.51      | 52.05 ± 1.58    | 95 ± 4          |

**a**

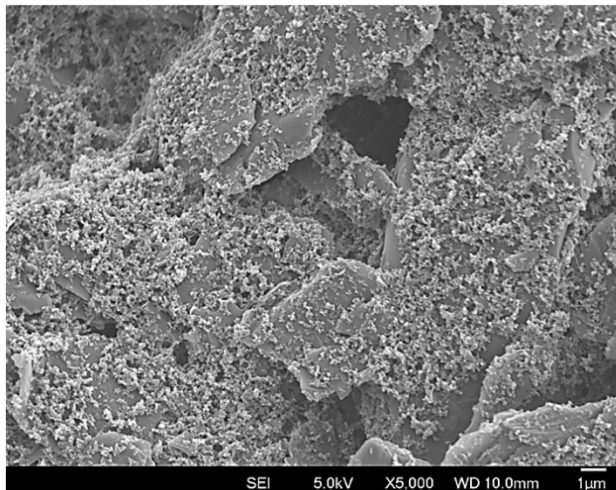

**b**

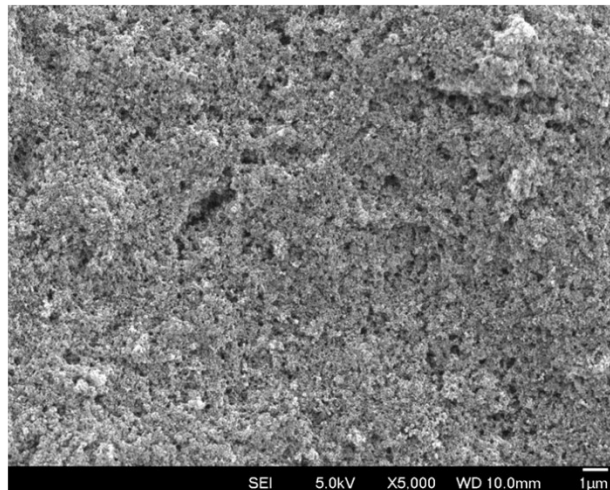

**Figure S1** SEM images of (a) unmodified, (b) carbon black (5 mg/mL in THF) modified screen-printed electrodes (x5000 magnified).

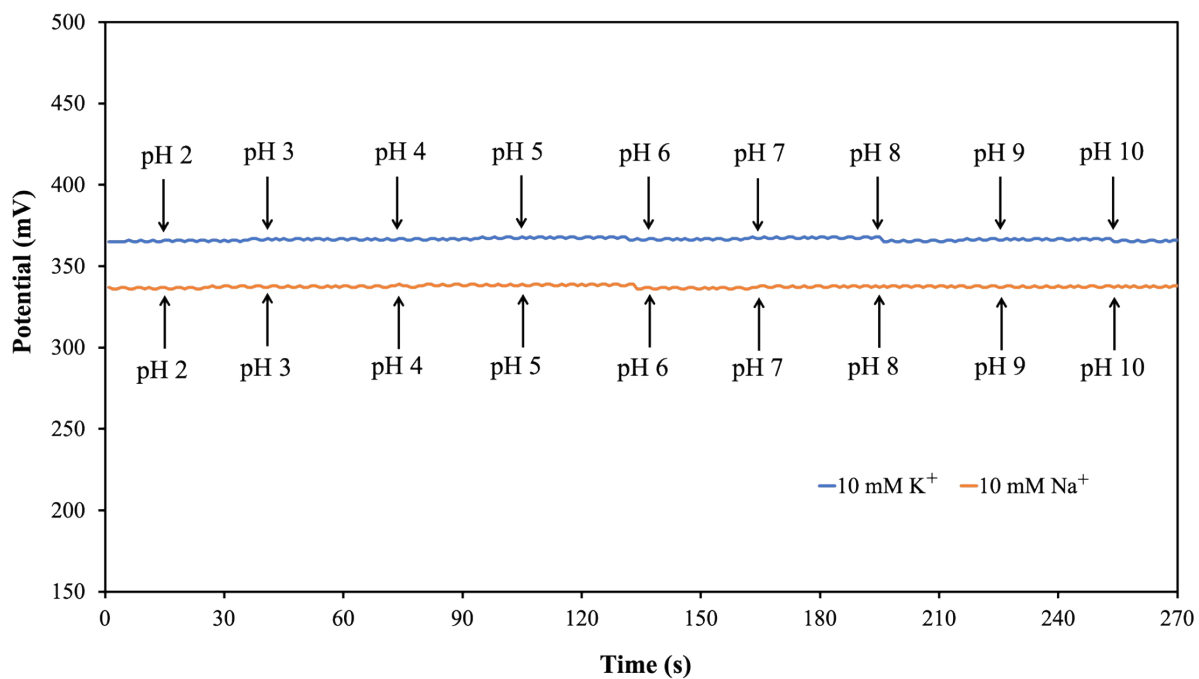

**Figure S2** The selectivity of (a) K<sup>+</sup>-ISE and (b) Na<sup>+</sup>-ISE in the coexistence of interference ions.

(Concentration: 10 mM of targets analyte (K<sup>+</sup> or Na<sup>+</sup>) and potential interferences including 100 mM of Ca<sup>2+</sup>, Mg<sup>2+</sup>, PO<sub>4</sub><sup>3-</sup>, CO<sub>3</sub><sup>2-</sup>, D-glucose, and Urea)

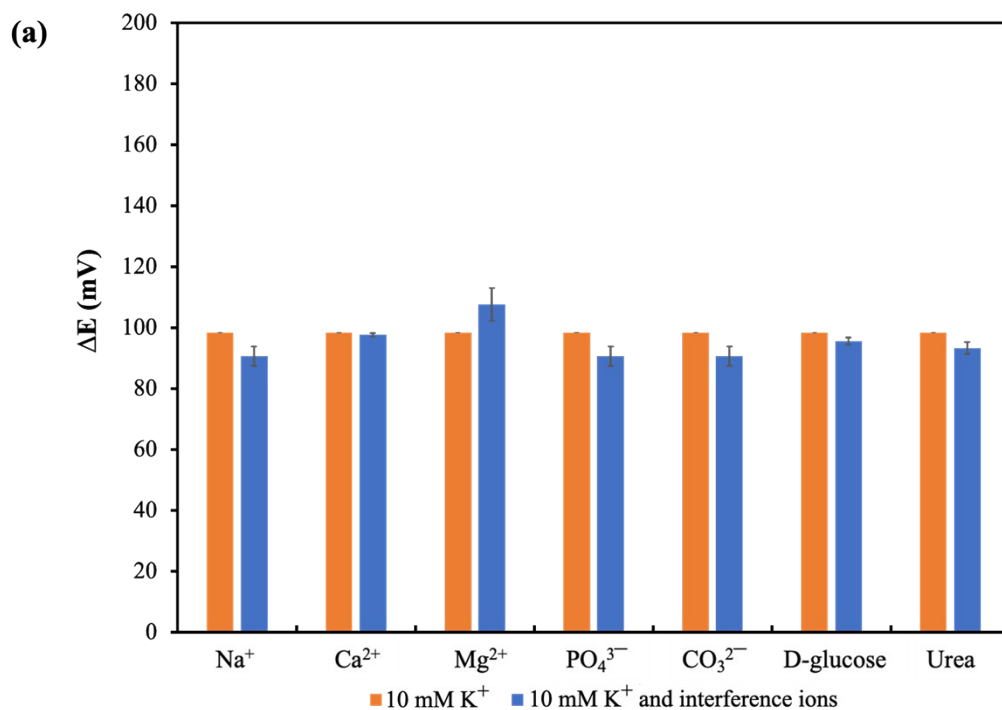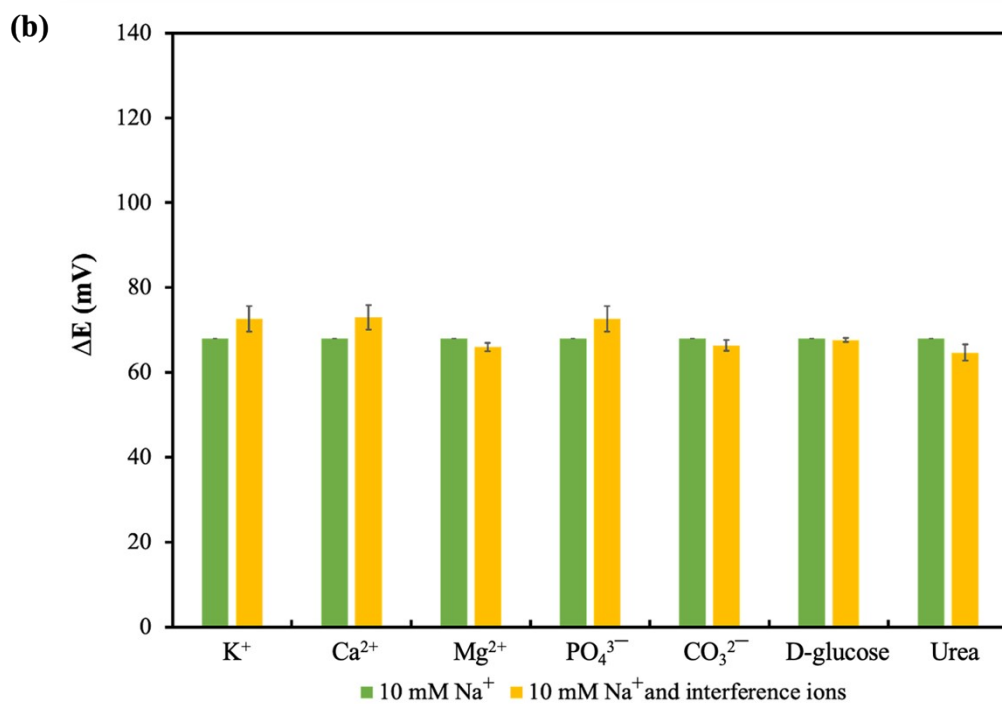

**Figure S3** The selectivity of (a) K<sup>+</sup> and (b) Na<sup>+</sup> in the coexistence of interference ions. (Concentration: 10 mM of targets analyte (K<sup>+</sup> or Na<sup>+</sup>) and potential interferences including 100 mM of Ca<sup>2+</sup>, Mg<sup>2+</sup>, PO<sub>4</sub><sup>3-</sup>, CO<sub>3</sub><sup>2-</sup>, D-glucose, and Urea)



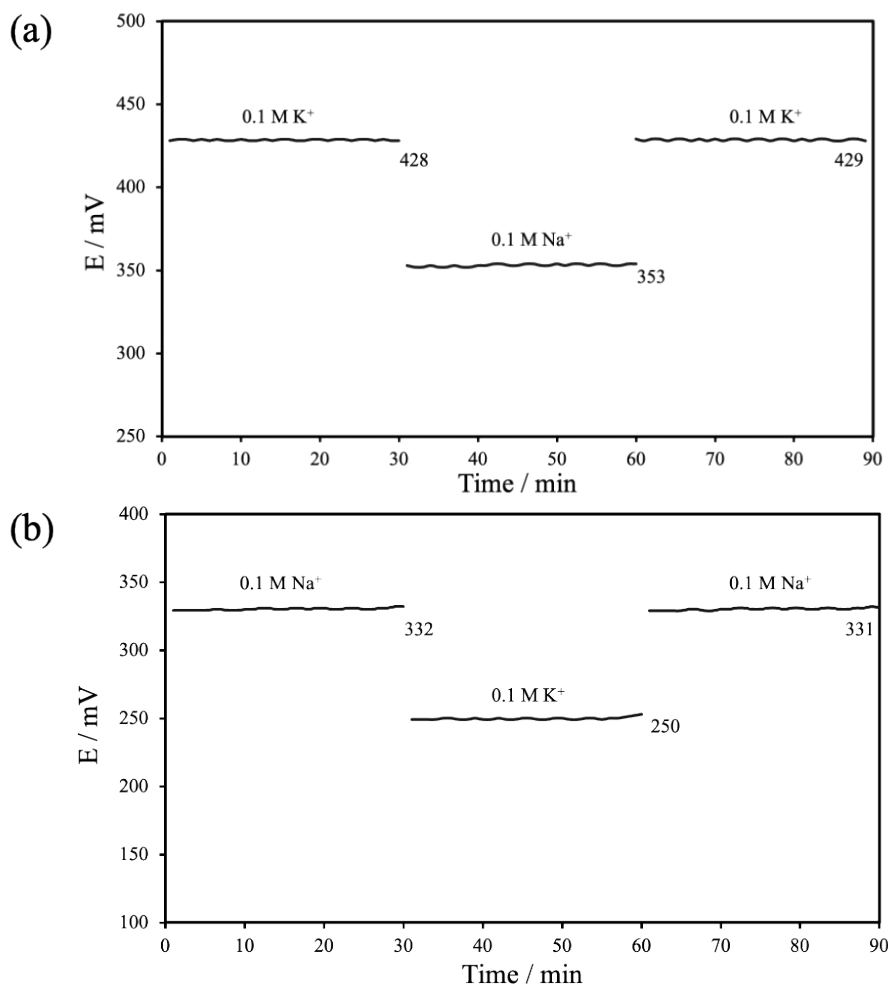

**Figure S4** Water layer tests of the (a)  $K^+$ -ISE and (b)  $Na^+$ -ISE.

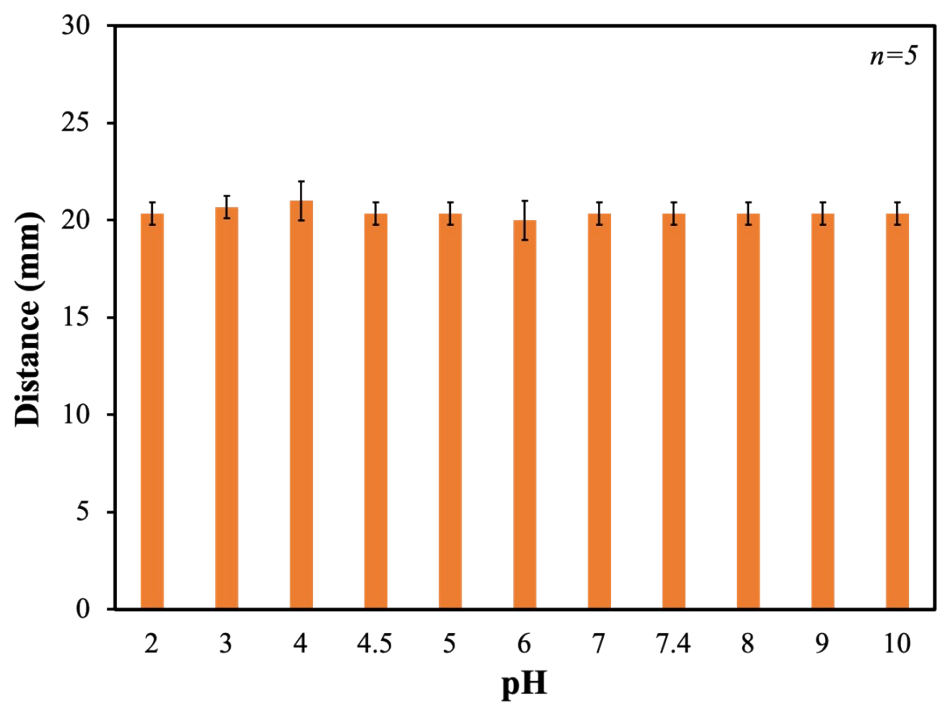

**Figure S5** Effect of pH on the Cl<sup>-</sup> detection on dPAD (20 mM Cl<sup>-</sup>)

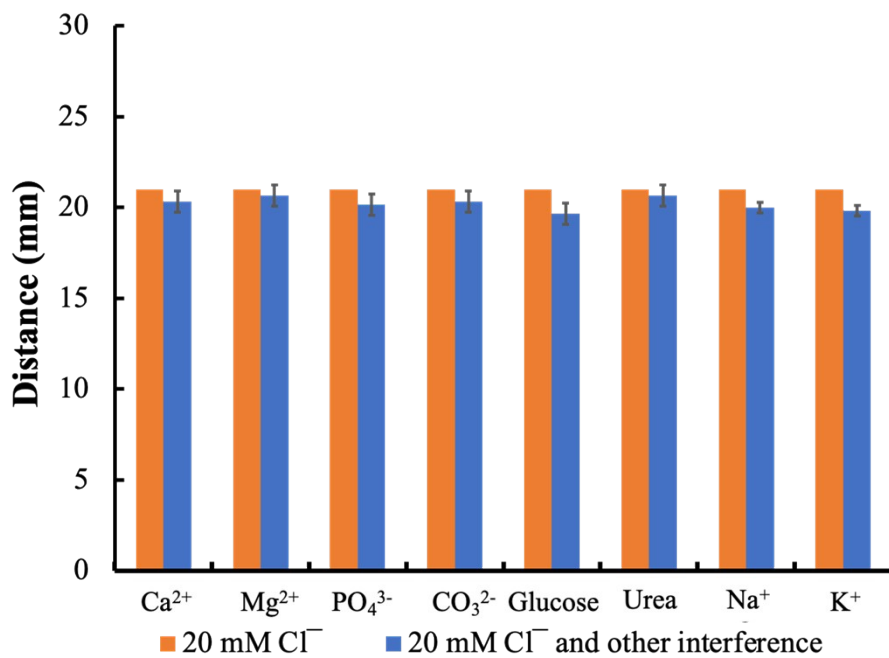

**Figure S6** The selectivity of Cl<sup>-</sup> in the coexistence of interference ions. Concentration: 20 mM Cl<sup>-</sup> and potential interferences including 100 mM of Ca<sup>2+</sup>, Mg<sup>2+</sup>, PO<sub>4</sub><sup>3-</sup>, CO<sub>3</sub><sup>2-</sup>, glucose, urea, Na<sup>+</sup>, and K<sup>+</sup>
